# Supplementary material
Source: PubMed Central journal article supplement (PMC3882272)
Supplement: NIHMS534554-supplement-1_si_001.pdf [file NIHMS534554-supplement-1_si_001.pdf]

## Supporting information

### **Geometric and Electronic Structure of the Mn(IV)Fe(III) Cofactor in Class Ic Ribonucleotide Reductase: Correlations to the Class Ia Binuclear Non-Heme Iron Enzymes**

Yeonju Kwak<sup>1</sup>, Wei Jiang<sup>2,3</sup>, Laura M.K. Dassama<sup>2</sup>, Kiyoun Park<sup>1</sup>, Caleb B. Bell, III.<sup>1</sup>, Lei V. Liu<sup>1</sup>, Shaun D. Wong<sup>1</sup>, Makina Saito<sup>4</sup>, Yasuhiro Kobayashi<sup>4</sup>, Shinji Kitao<sup>4</sup>, Makoto Seto<sup>4</sup>, Yoshitaka Yoda<sup>5</sup>, E. Ercan Alp<sup>6</sup>, Jiyong Zhao<sup>6</sup>, J Martin Bollinger, Jr.\*<sup>2,3</sup>, Carsten Krebs\*<sup>2,3</sup>, and Edward I. Solomon\*<sup>1</sup>

<sup>1</sup>Department of Chemistry, Stanford University, Stanford, California 94305, United States

<sup>2</sup>Department of Biochemistry and Molecular Biology and <sup>3</sup>Chemistry, The Pennsylvania State University, University Park, Pennsylvania 16802, United States

<sup>4</sup>Research Reactor Institute, Kyoto University, Kumatori-Cho, Osaka 590-0494, Japan

<sup>5</sup>Spring 8/JASRI, 1-1-1 Kouto, Mikazuki-Cho, Sayo-gun, Hyogo 679-5198, Japan

<sup>6</sup>Advanced Photon Source, Argonne National Laboratory, Illinois 60439, United States

**Figure S1.** 4.2-K/0-mT Mössbauer spectrum of a sample containing the Mn<sup>IV</sup>/Fe<sup>III</sup> cofactor of *Ct* RNR-R2 (vertical bars).

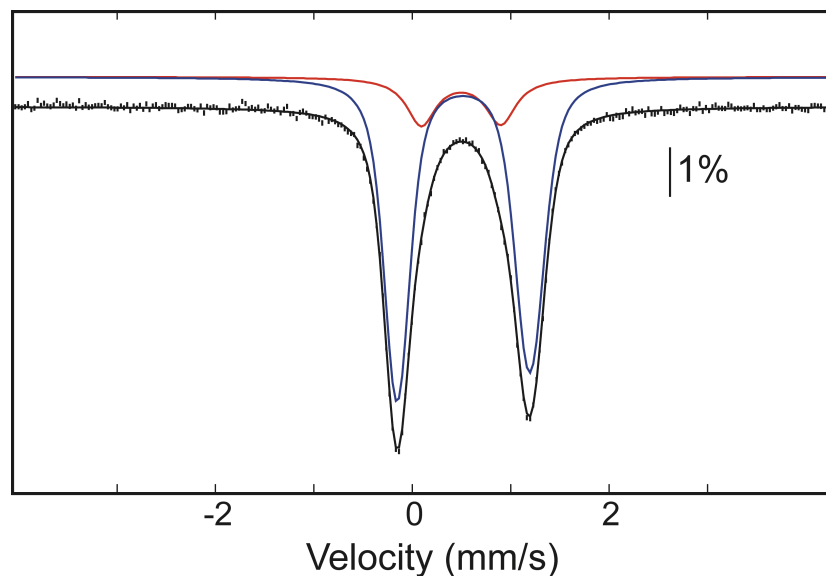

The sample was prepared as previously described (ref.22) to maximize the yield of the cofactor and minimize the formation of catalytically inactive Fe<sub>2</sub><sup>III/III</sup> clusters. The solid red and blue spectra are simulations of the Fe<sub>2</sub><sup>III/III</sup> and Mn<sup>IV</sup>/Fe<sup>III</sup> components, respectively, using parameters provided in Table S 2.1. The solid black line is the sum of the red and blue spectra. The ratio of Mn<sup>IV</sup>/Fe<sup>III</sup> to Fe<sub>2</sub><sup>III/III</sup> is ~ 6.5:1, a yield comparable to the best preparations of the Mn<sup>IV</sup>/Fe<sup>III</sup> cofactor *in vitro*.

Table S1. Mössbauer parameters used to simulate spectra in Figure S1.

| Parameter              | Mn <sup>IV</sup> /Fe <sup>III</sup> | Fe <sub>2</sub> <sup>III/III</sup> |
|------------------------|-------------------------------------|------------------------------------|
| δ (mm/s)               | 0.52                                | 0.50                               |
| ΔE <sub>Q</sub> (mm/s) | 1.35                                | 0.80                               |
| Rel. Area (%)          | 85                                  | 15                                 |

**Figure S2.** 4.2-K/53-mT Mössbauer spectrum of the Mn/Fe-Ct RNR-R2 used in this study.

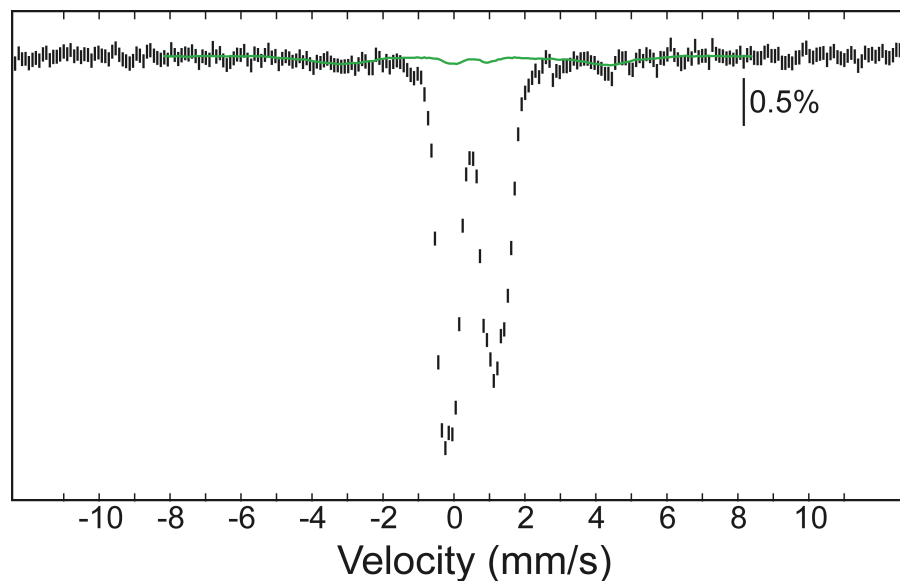

The spectrum (black vertical bars), acquired over a wider range of Doppler velocities reveals a minor contribution from the  $\text{Mn}^{\text{III}}/\text{Fe}^{\text{III}}$  cluster. This  $S=1/2$  cluster exhibits a broad, magnetically split spectrum (see absorption intensities at  $\sim +4$  and  $-4$  mm/s) with the addition of a small externally applied magnetic field. Based on the experimental “reference” spectrum (solid green line) of a sample prepared to contain only the  $\text{Mn}^{\text{III}}/\text{Fe}^{\text{III}}$  cluster, the contribution of this component to the spectrum is estimated to be 7-10%.

**Figure S3.** Simulated NRVS spectra for different structures of  $\text{Mn}^{\text{IV}}\text{Fe}^{\text{III}}$  intermediate. Core structures are shown as an inset for each spectrum.

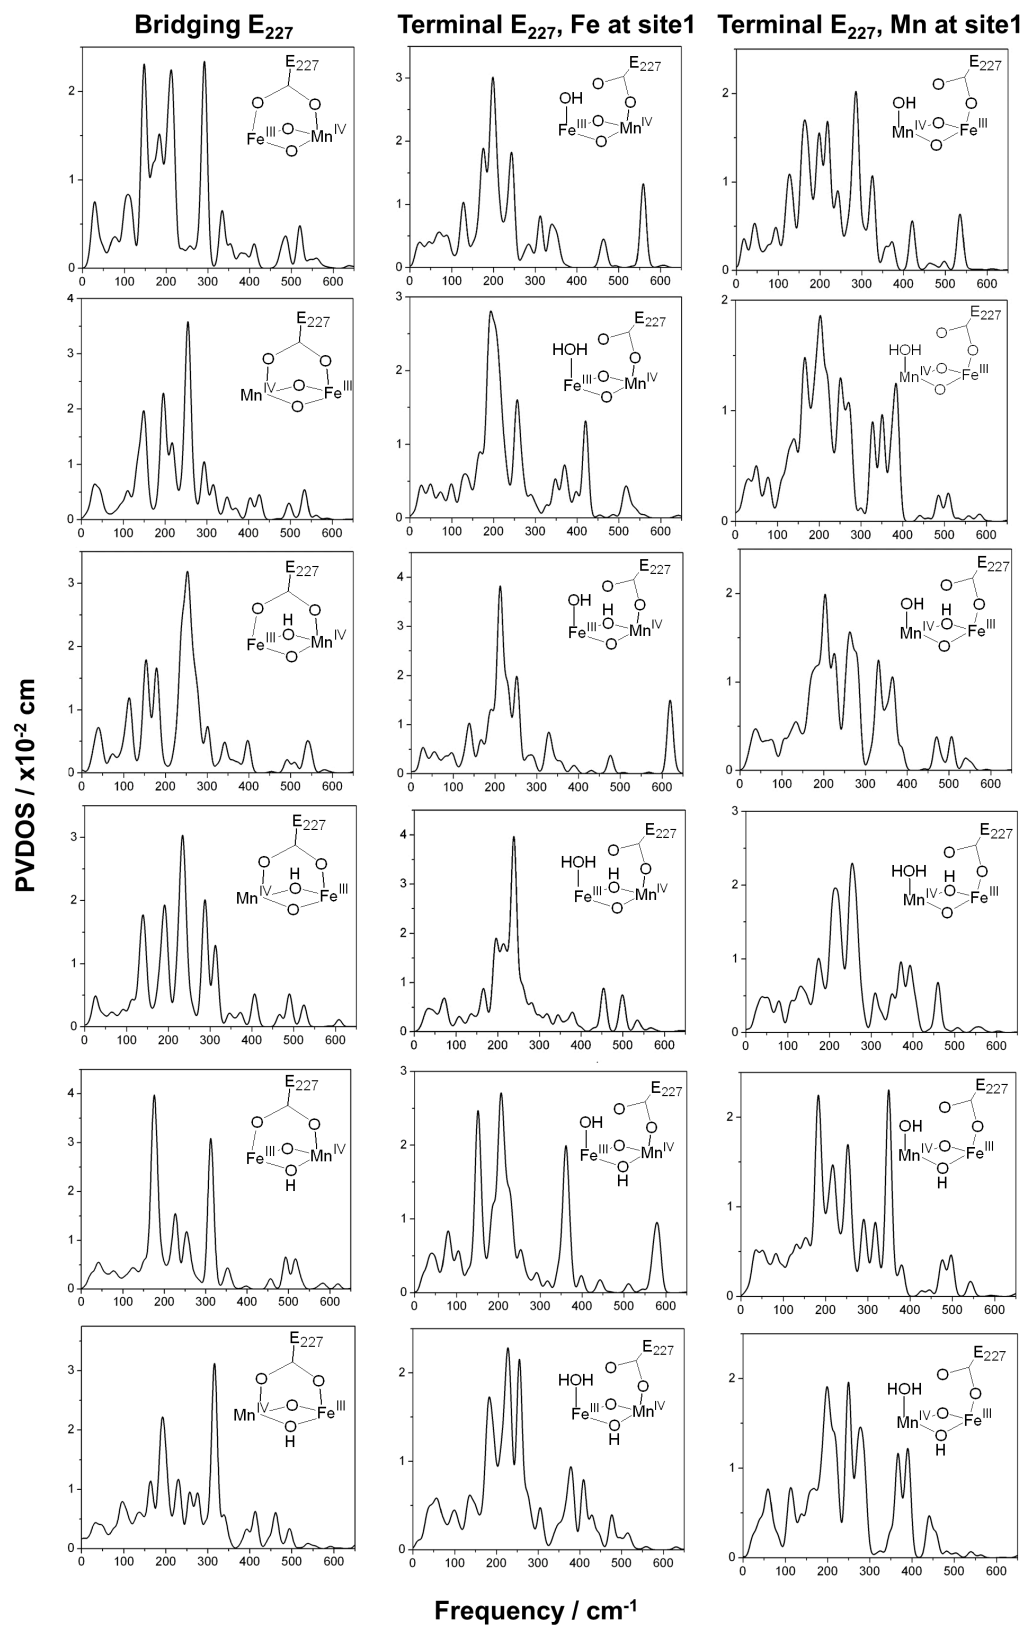

**Figure S4.** MCD spectra on  $\text{Mn}^{\text{IV}}\text{Fe}^{\text{III}}$  intermediate with different temperatures and fields

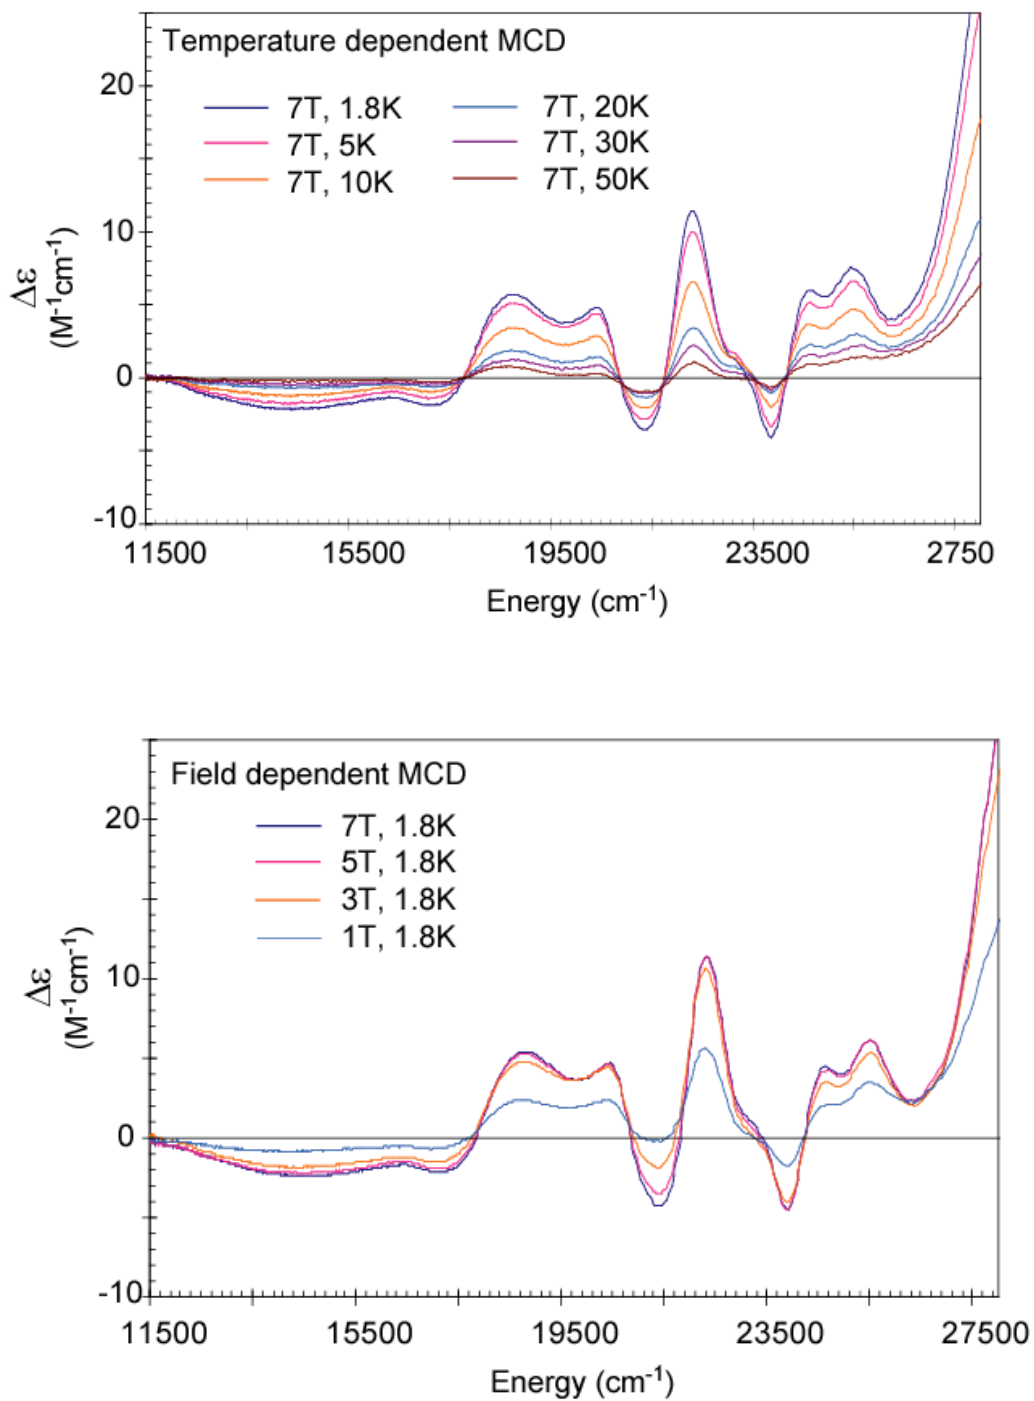

**Figure S5.** Room temperature /Low temperature absorption (upper) and CD (lower) spectra of the  $\text{Mn}^{\text{IV}}\text{Fe}^{\text{III}}$  intermediate

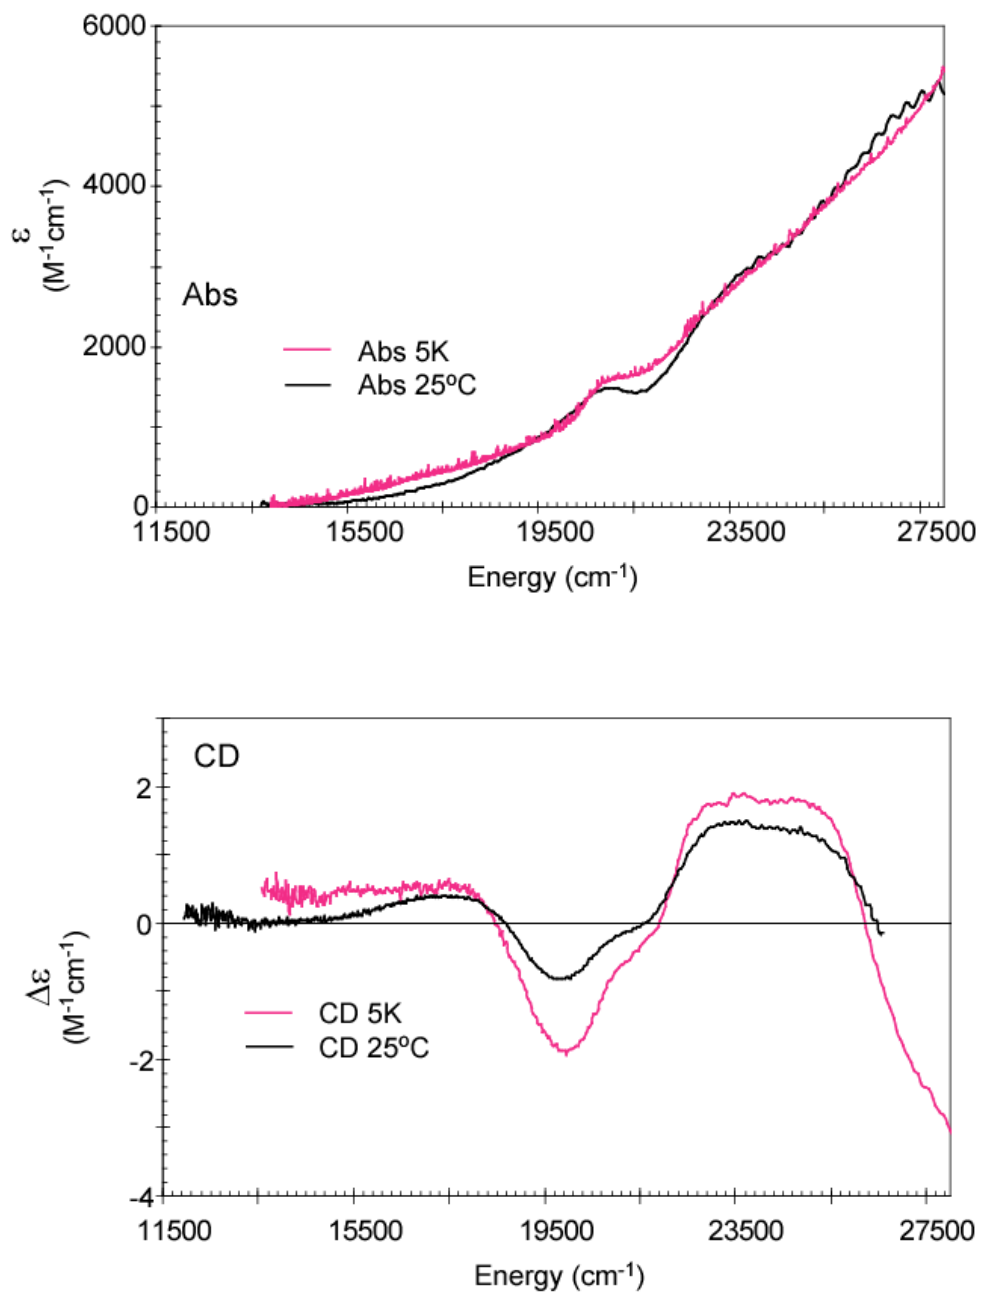

**Figure S6.** MCD spectra of  $\text{Fe}^{\text{III}}\text{Fe}^{\text{III}}$  *Ct* RNR control

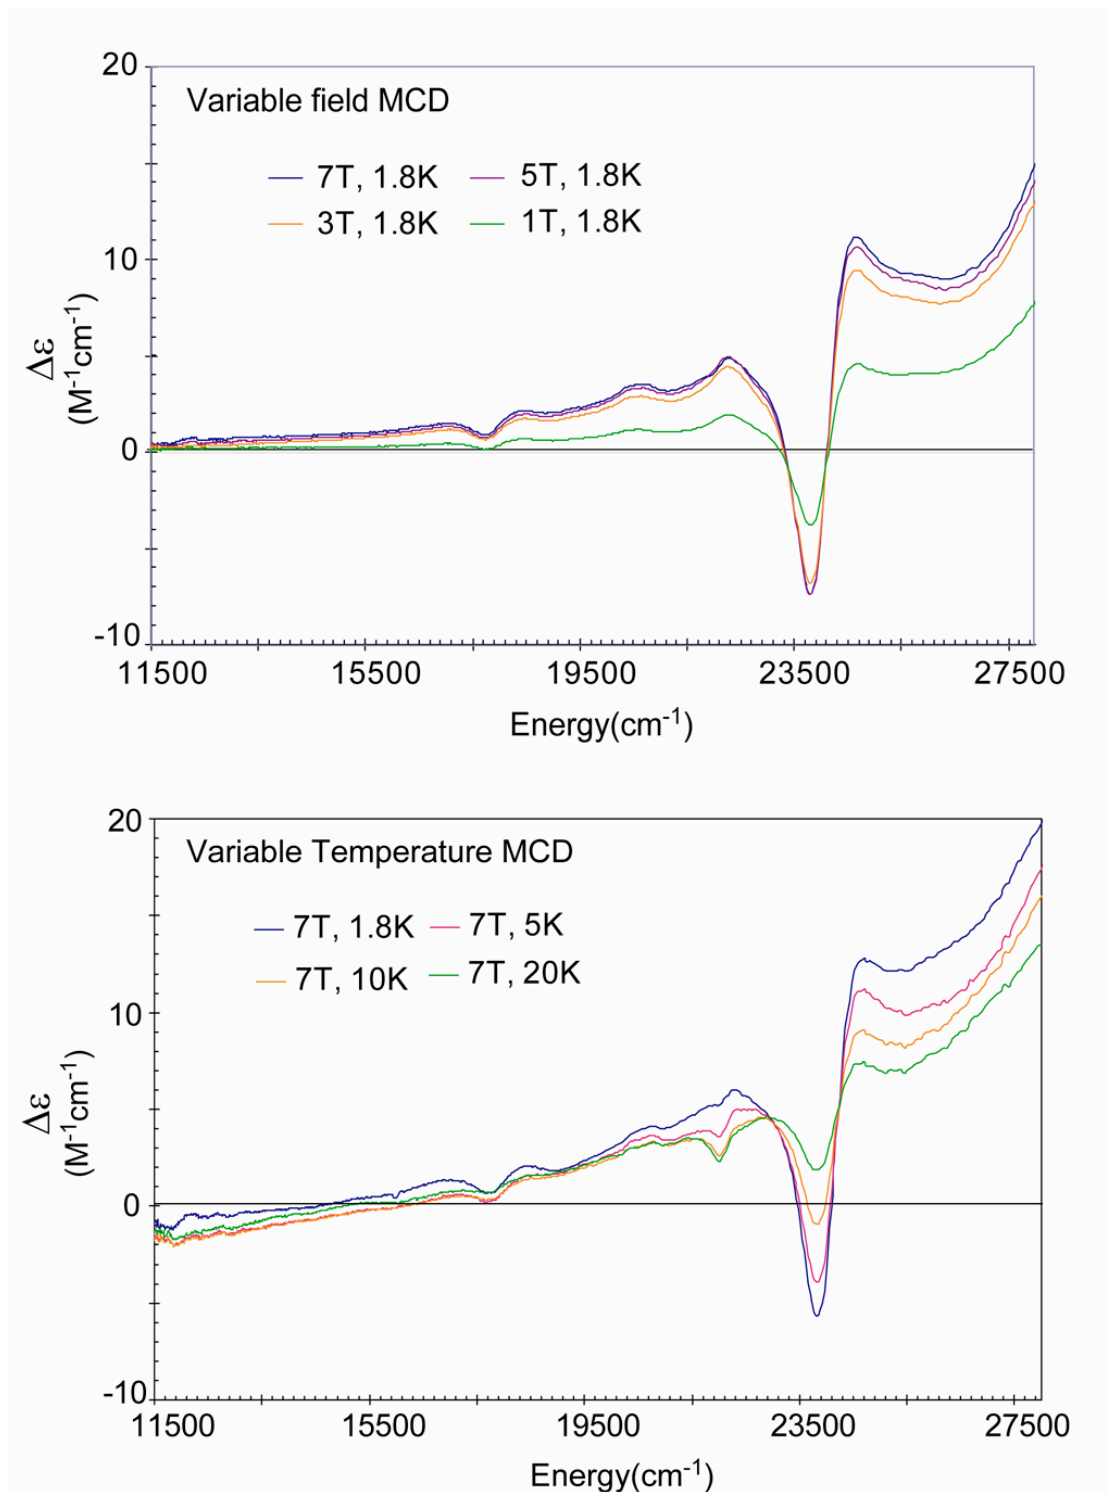

**Figure S7.** (a) crystal and computational structure of  $[\text{Mn}^{\text{IV}}(\mu\text{-O})_2\text{Mn}^{\text{III}}(\text{OAc})(\text{Tpen})]^{3+}$  model complex (MnTpen) used; (b) ligand to metal CT to  $\text{Mn}^{\text{IV}}$  site comparison between experimental observation and TD DFT calculation; and (c) spectroscopic and experimental d-d transitions for  $\text{Mn}^{\text{III}}$  and  $\text{Mn}^{\text{IV}}$ . (Adapted and modified from reference 53)

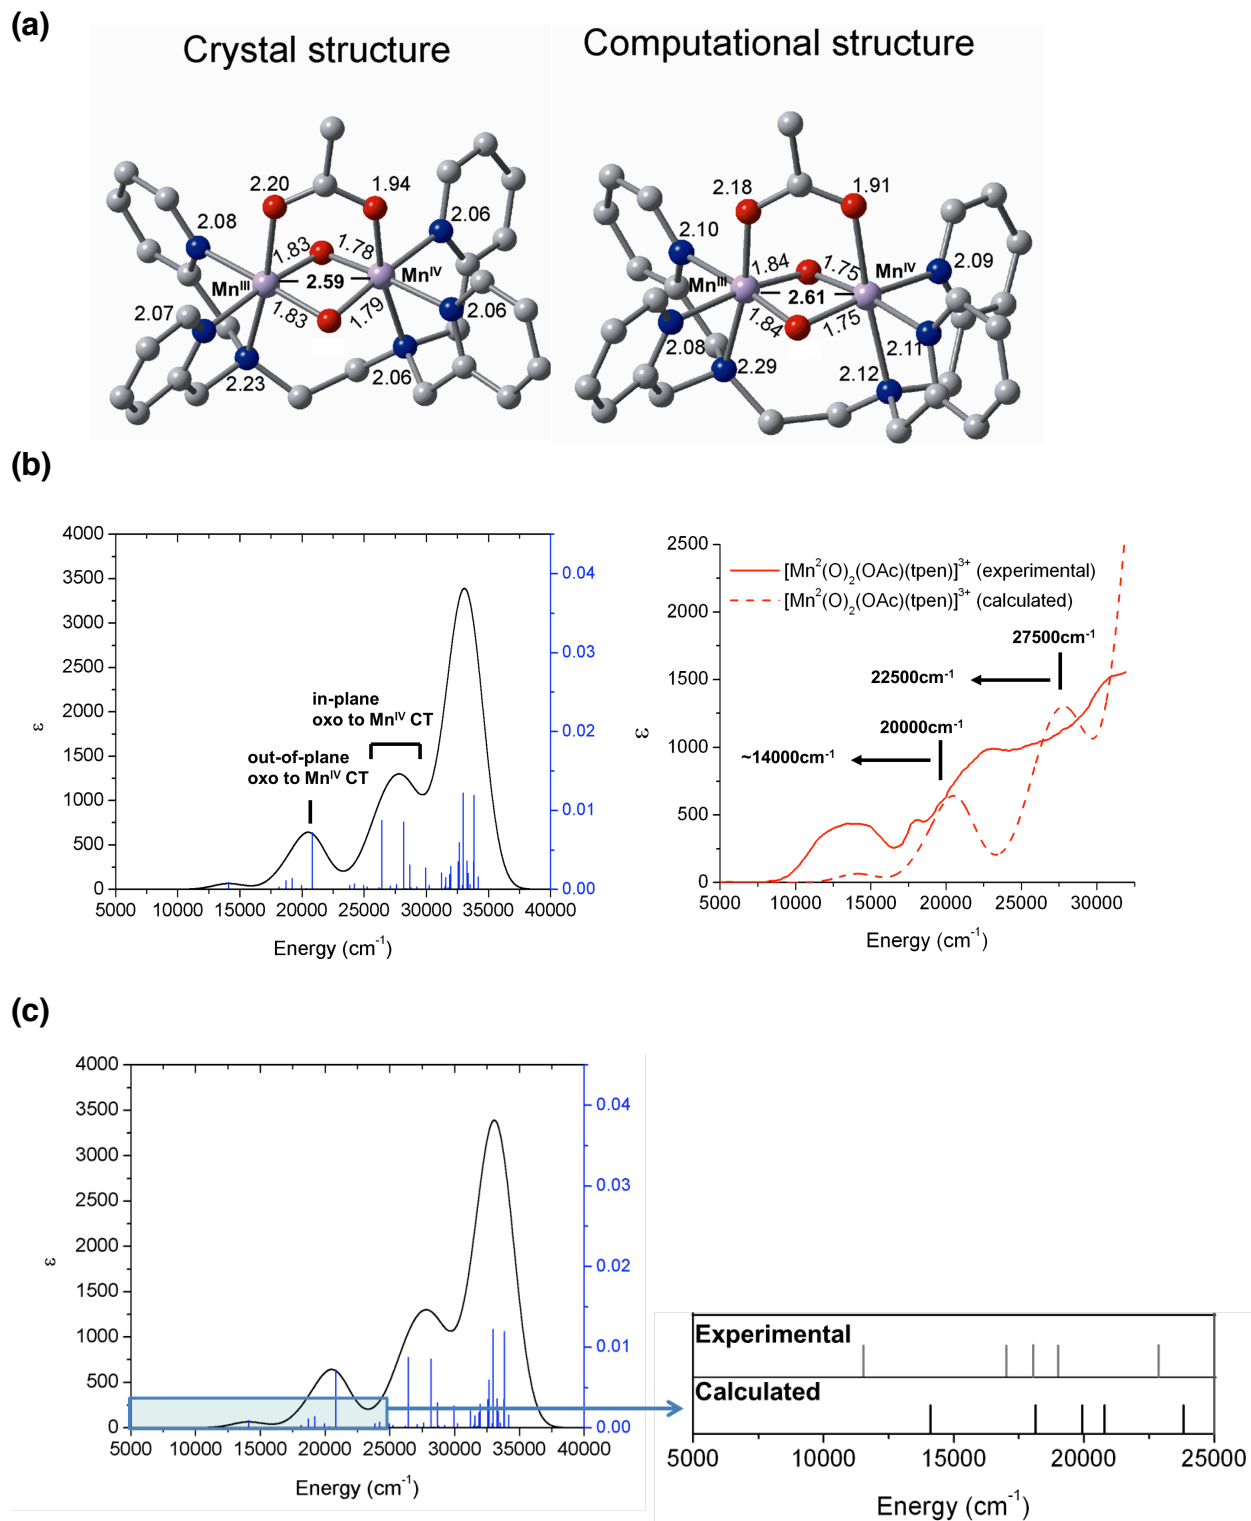



**Figure S8-1.** Structure of (a) bis- $\mu$ -oxo  $\text{Fe}^{\text{III}}\text{Fe}^{\text{III}}$  model complex ( $[\text{Fe}_2(\mu\text{-O})_2(6\text{TLA})_2]^{2-}$ ); and (b)  $\mu$ -oxo,  $\mu$ -hydroxo  $\text{Fe}^{\text{III}}\text{Fe}^{\text{III}}$  model complex ( $[\text{Fe}_2(\mu\text{-O})(\mu\text{-OH})(6\text{TLA})_2]^{2-}$ ). Adapted from ref 54-56

(a)

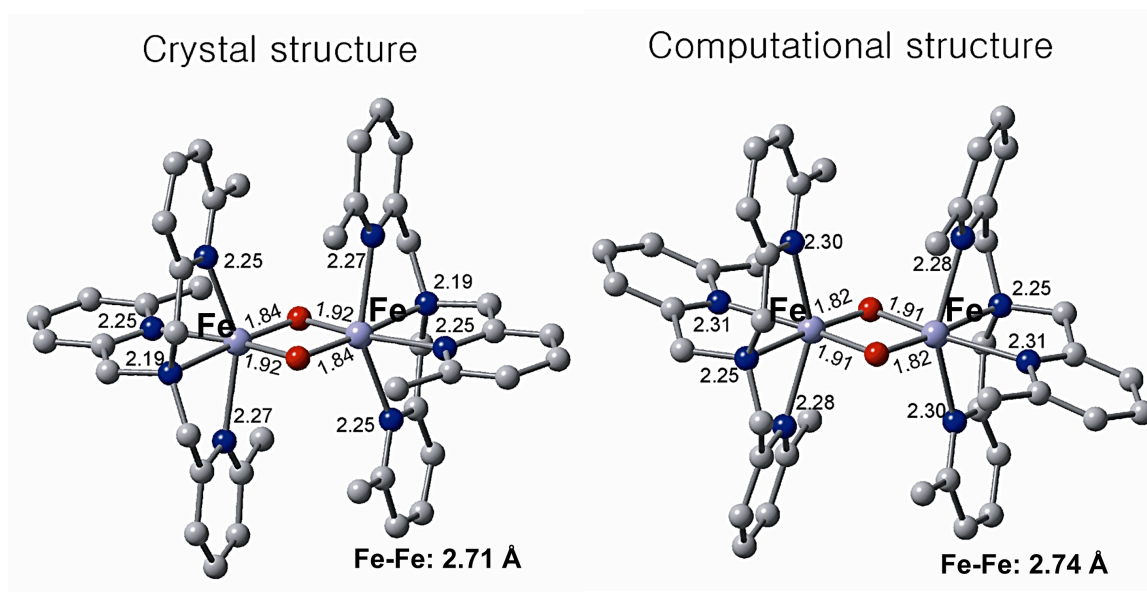

(b)

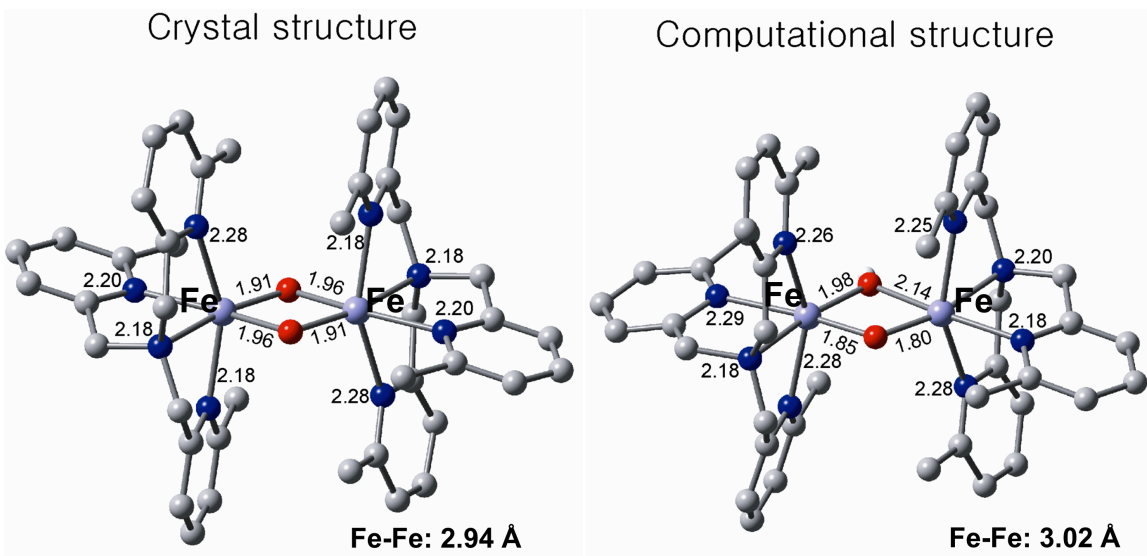

**Figure S8-2.** (a) experimental Abs data on  $\text{Fe}^{\text{III}}-(\mu\text{-O})_2\text{-Fe}^{\text{III}}$  &  $\text{Fe}^{\text{III}}-(\mu\text{-O}, \mu\text{-OH})\text{-Fe}^{\text{III}}$  model complex (from S8-1); (b) TD DFT of  $\text{Fe}^{\text{III}}-(\mu\text{-O})_2\text{-Fe}^{\text{III}}$  &  $\text{Fe}^{\text{III}}-(\mu\text{-O}, \mu\text{-OH})\text{-Fe}^{\text{III}}$  model complex; (c) comparison between experimental Abs and calculated TD DFT energy. Adapted and modified from reference 56.

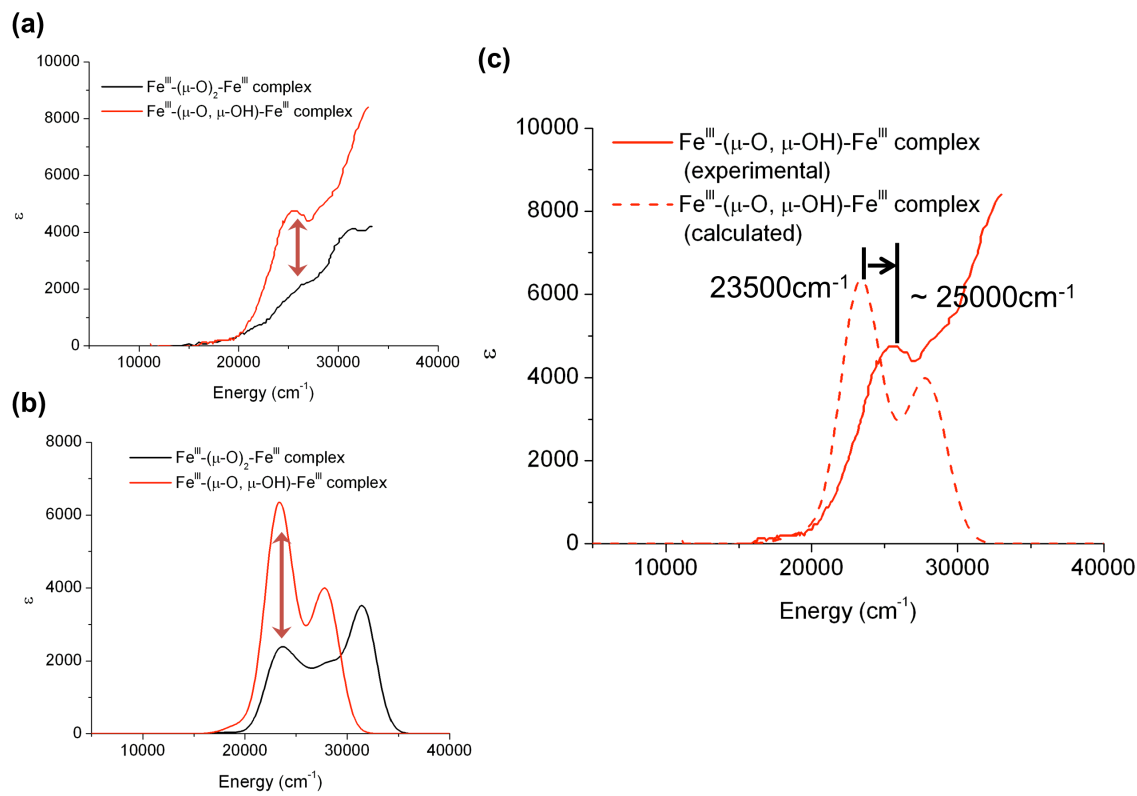

**Figure S9.** Gaussian broadened TD DFT calculation for  $\mu$ -oxo to  $\text{Fe}^{\text{III}}$  CT transitions (first 40 transitions) of (a) GaFe structure with terminal OH on  $\text{Ga}^{\text{III}}$ , (b) GaFe structure with terminal water on  $\text{Ga}^{\text{III}}$ . Both have  $\mu$ -oxo,  $\mu$ -hydroxo bridges.

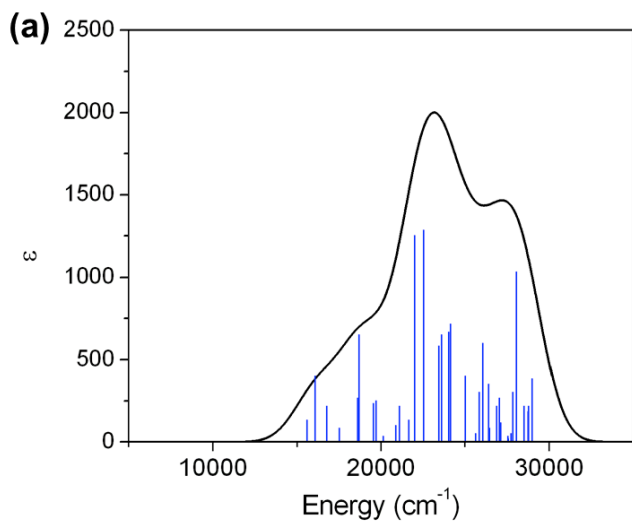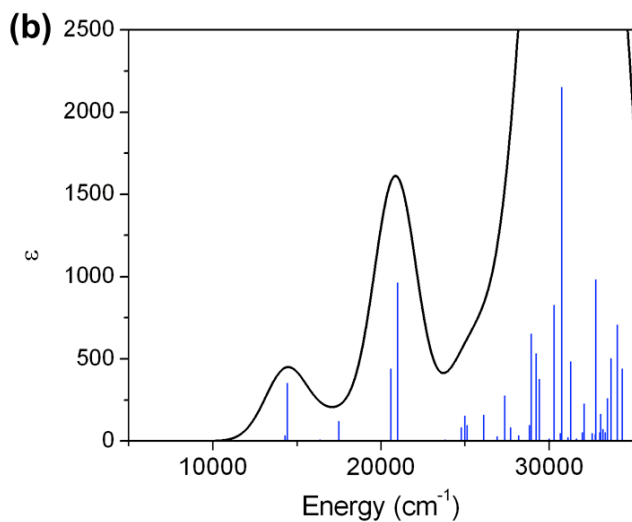

### S10. Structure used for Mn<sup>IV</sup>Fe<sup>III</sup> TD DFT computation

(a) Mn<sup>IV</sup>Ga<sup>III</sup> active site with terminal OH on Mn<sup>IV</sup>,  $\mu$ -O,  $\mu$ -OH bridges

|   |             |             |             |
|---|-------------|-------------|-------------|
| C | 5.31358800  | -2.04215900 | -2.16784900 |
| C | 4.55443500  | -2.91404800 | -1.15479900 |
| C | 3.89034900  | -2.03094500 | -0.08329900 |
| O | 2.89661600  | -1.34280500 | -0.56438700 |
| O | 4.37412300  | -1.96664100 | 1.04699500  |
| C | 2.62946400  | 1.48694900  | -4.15691400 |
| C | 1.23977500  | 1.86282800  | -3.62323700 |
| C | 0.79435700  | 1.08721300  | -2.37208700 |
| O | 1.70602100  | 0.75383300  | -1.55705500 |
| O | -0.44753200 | 0.86644200  | -2.26018500 |
| C | 5.01161400  | 1.06778900  | 0.49334800  |
| C | 3.89663000  | 1.49153900  | 1.39547100  |
| N | 2.58231300  | 1.05008300  | 1.29275400  |
| C | 3.98191900  | 2.33075400  | 2.47720200  |
| C | 1.90612500  | 1.59252700  | 2.29086300  |
| N | 2.71296900  | 2.38146500  | 3.03307400  |
| C | -4.42647400 | -3.64908400 | -0.23950900 |
| C | -3.25813600 | -3.04265900 | -1.03142500 |
| C | -3.59261600 | -1.67059400 | -1.64071500 |
| O | -4.74407200 | -1.43616500 | -2.00808600 |
| O | -2.59964300 | -0.82969900 | -1.83065500 |
| C | -2.95650900 | -0.30263000 | 3.94052800  |
| C | -3.29304800 | -1.49462700 | 3.03672300  |
| C | -2.26738700 | -1.53627000 | 1.90312200  |
| O | -1.28300200 | -2.27758400 | 2.01007300  |
| O | -2.53021100 | -0.70865200 | 0.94324000  |
| C | -5.05239200 | 1.41178800  | -0.43641500 |
| C | -3.83771400 | 2.28999600  | -0.40341400 |
| N | -2.52325900 | 1.82899300  | -0.41185300 |
| C | -3.80926500 | 3.65955600  | -0.31655100 |
| C | -1.73910200 | 2.88639200  | -0.32155800 |
| N | -2.47238100 | 4.02297600  | -0.26346500 |
| H | 4.62582100  | -1.33680600 | -2.64483600 |
| H | 6.10159300  | -1.46383200 | -1.66950700 |
| H | 5.78804600  | -2.64961900 | -2.94982600 |
| H | 5.23803600  | -3.60950400 | -0.65633800 |
| H | 3.78407500  | -3.49427900 | -1.67708700 |
| H | 2.90009700  | 2.11315400  | -5.01610200 |
| H | 3.38597100  | 1.60940500  | -3.37712800 |
| H | 2.65659300  | 0.43963000  | -4.47861400 |
| H | 1.22645000  | 2.93020100  | -3.35464800 |
| H | 0.46785600  | 1.72857600  | -4.38771400 |
| H | 5.28903800  | 0.03372900  | 0.71883700  |
| H | 4.69689700  | 1.10699900  | -0.55437600 |
| H | 5.87901300  | 1.72262200  | 0.63203500  |
| H | 4.81729100  | 2.87301800  | 2.89274100  |
| H | 0.85331000  | 1.42243900  | 2.45691500  |
| H | 2.43797300  | 2.88464900  | 3.86208900  |
| H | -5.32815900 | -3.68032100 | -0.85837800 |
| H | -4.18708600 | -4.66437100 | 0.09985100  |
| H | -4.65080800 | -3.04061400 | 0.64350500  |

|    |             |             |             |
|----|-------------|-------------|-------------|
| H  | -3.01017700 | -3.70024000 | -1.87936500 |
| H  | -2.35524100 | -2.98079500 | -0.41988800 |
| H  | -3.65128500 | -0.22504000 | 4.78727100  |
| H  | -3.00325500 | 0.63057100  | 3.36931100  |
| H  | -1.94152600 | -0.40460100 | 4.34190500  |
| H  | -4.30375800 | -1.38236700 | 2.62860200  |
| H  | -3.23722700 | -2.43122000 | 3.60056000  |
| H  | -5.95783200 | 2.02711500  | -0.47731900 |
| H  | -5.03243700 | 0.72322400  | -1.28879600 |
| H  | -5.08971200 | 0.78502900  | 0.46185500  |
| H  | -4.60556300 | 4.38753100  | -0.28376000 |
| H  | -0.66254100 | 2.83150900  | -0.26351100 |
| H  | -2.10476900 | 4.95979700  | -0.20521700 |
| O  | -0.02534000 | 0.68859000  | 0.54057000  |
| O  | 1.29727800  | -1.31761400 | 1.66834100  |
| H  | 0.38103300  | -1.68062800 | 1.73148800  |
| O  | 0.13442200  | -1.45539300 | -0.72018800 |
| H  | 0.45451900  | -1.62822500 | -1.61945000 |
| Mn | 1.39500600  | -0.33395500 | 0.19987300  |
| Ga | -1.38054800 | -0.08476900 | -0.55128700 |

(b) Ga<sup>III</sup>Fe<sup>III</sup> active site with terminal OH on Ga<sup>III</sup>,  $\mu$ -O,  $\mu$ -OH bridges

|   |             |             |             |
|---|-------------|-------------|-------------|
| C | 5.31358400  | -2.04215900 | -2.16784600 |
| C | 4.58079300  | -2.94650500 | -1.14094900 |
| C | 3.97375200  | -2.06375100 | -0.02838500 |
| O | 2.95652500  | -1.31646800 | -0.48662500 |
| O | 4.50590500  | -2.01136700 | 1.12620600  |
| C | 2.62946600  | 1.48694800  | -4.15691600 |
| C | 1.41952900  | 2.13252500  | -3.43099600 |
| C | 0.90882100  | 1.30599500  | -2.22875300 |
| O | 1.81768100  | 0.90873700  | -1.37113400 |
| O | -0.37494000 | 1.08793000  | -2.15700500 |
| C | 5.01161500  | 1.06779100  | 0.49334700  |
| C | 3.94823100  | 1.44013900  | 1.48675900  |
| N | 2.61385300  | 0.97447300  | 1.44761200  |
| C | 4.08621300  | 2.24332000  | 2.62274900  |
| C | 1.97157800  | 1.46623700  | 2.52599600  |
| N | 2.83353700  | 2.24391400  | 3.26862700  |
| C | -4.42647400 | -3.64908400 | -0.23950900 |
| C | -3.31464200 | -3.10758300 | -1.17562200 |
| C | -3.64163500 | -1.70040500 | -1.72827300 |
| O | -4.82997600 | -1.40614200 | -2.09623500 |
| O | -2.61201300 | -0.84097200 | -1.83011100 |
| C | -2.95651000 | -0.30263200 | 3.94052400  |
| C | -3.20575700 | -1.59255000 | 3.11784000  |
| C | -2.14361500 | -1.62939400 | 2.00921900  |
| O | -1.04872200 | -2.26830600 | 2.22684300  |
| O | -2.44015500 | -0.90972000 | 0.94067700  |
| C | -5.05239200 | 1.41178800  | -0.43641100 |
| C | -3.86166800 | 2.31716200  | -0.27416300 |
| N | -2.51452700 | 1.87040000  | -0.24483900 |
| C | -3.86021400 | 3.70417300  | -0.09039000 |
| C | -1.73492400 | 2.95086000  | -0.04111000 |
| N | -2.51155400 | 4.08980800  | 0.05539300  |
| H | 4.59955700  | -1.32270900 | -2.60545800 |
| H | 6.12598600  | -1.47291900 | -1.67658900 |

|    |             |             |             |
|----|-------------|-------------|-------------|
| H  | 5.76145800  | -2.64127300 | -2.98543000 |
| H  | 5.28056200  | -3.66509900 | -0.67677100 |
| H  | 3.77188200  | -3.50557800 | -1.64833900 |
| H  | 3.00734500  | 2.14980600  | -4.95947700 |
| H  | 3.44171800  | 1.29452400  | -3.43470700 |
| H  | 2.34301300  | 0.52050500  | -4.61169500 |
| H  | 1.71764600  | 3.12875400  | -3.04192800 |
| H  | 0.56843300  | 2.27843600  | -4.11929300 |
| H  | 5.36394300  | 0.04259800  | 0.70688000  |
| H  | 4.59907500  | 1.07615600  | -0.53026200 |
| H  | 5.86210400  | 1.77108400  | 0.55639000  |
| H  | 4.95054500  | 2.77189300  | 3.01474000  |
| H  | 0.92836400  | 1.26420200  | 2.74973400  |
| H  | 2.60173200  | 2.71523200  | 4.14053800  |
| H  | -5.40567100 | -3.60417900 | -0.74957200 |
| H  | -4.21692800 | -4.69480500 | 0.05868600  |
| H  | -4.48608100 | -3.03125800 | 0.67408400  |
| H  | -3.20612200 | -3.78171900 | -2.05233800 |
| H  | -2.33974600 | -3.07055800 | -0.66081300 |
| H  | -3.69465400 | -0.19628300 | 4.76003700  |
| H  | -3.02987700 | 0.58325000  | 3.28404600  |
| H  | -1.94462500 | -0.32335300 | 4.38616300  |
| H  | -4.21604000 | -1.57031700 | 2.67089500  |
| H  | -3.10028500 | -2.48888800 | 3.75459200  |
| H  | -5.97996700 | 2.00563000  | -0.52367300 |
| H  | -4.94933100 | 0.75423800  | -1.32094100 |
| H  | -5.14045300 | 0.73388900  | 0.43330100  |
| H  | -4.68033200 | 4.41621400  | -0.05272900 |
| H  | -0.65264800 | 2.90752200  | 0.05255000  |
| H  | -2.16537400 | 5.03731200  | 0.19444600  |
| O  | 0.00649000  | 0.65332500  | 0.65135000  |
| O  | 1.36458400  | -1.40836900 | 1.70866500  |
| H  | 0.41556700  | -1.79989900 | 1.81914600  |
| O  | 0.20986300  | -1.33588200 | -0.73450100 |
| H  | 0.61916600  | -1.81307200 | -1.49665600 |
| Ga | 1.47854000  | -0.31284500 | 0.30360400  |
| Fe | -1.37175800 | -0.00328000 | -0.53632500 |

(c) Mn<sup>IV</sup>Ga<sup>III</sup> active site with terminal H<sub>2</sub>O on Mn<sup>IV</sup>, μ-O, μ-OH bridges

|   |             |             |             |
|---|-------------|-------------|-------------|
| C | 5.47031400  | -2.08425600 | -1.75503600 |
| C | 4.58487300  | -2.90779000 | -0.80969400 |
| C | 3.61267100  | -2.13500600 | 0.08676600  |
| O | 3.09577000  | -1.05460400 | -0.41197400 |
| O | 3.34262200  | -2.60104100 | 1.21008500  |
| C | 2.73487200  | 1.16519200  | -4.11592900 |
| C | 1.31283900  | 1.59941500  | -3.73850200 |
| C | 0.82251800  | 1.03187000  | -2.41157500 |
| O | 1.74453200  | 0.85010600  | -1.52849100 |
| O | -0.39569000 | 0.78931100  | -2.26363900 |
| C | 5.05711900  | 1.26408500  | 0.58223500  |
| C | 3.91289600  | 1.86726200  | 1.32542600  |
| N | 2.58231200  | 1.48440200  | 1.17971900  |
| C | 3.97134800  | 2.85661300  | 2.27195400  |
| C | 1.87039000  | 2.21792100  | 2.02689800  |
| N | 2.67387400  | 3.06122800  | 2.70322600  |
| C | -4.25734500 | -3.73184000 | 0.20147600  |

|    |             |             |             |
|----|-------------|-------------|-------------|
| C  | -3.07810300 | -3.16973700 | -0.60748000 |
| C  | -3.42043300 | -1.87312900 | -1.35082700 |
| O  | -4.56387300 | -1.65854700 | -1.72889700 |
| O  | -2.40947600 | -1.05823000 | -1.63998800 |
| C  | -2.92717000 | 0.04465400  | 4.04869200  |
| C  | -3.03481500 | -1.27705300 | 3.27524000  |
| C  | -1.98819100 | -1.26087800 | 2.17289800  |
| O  | -0.89820900 | -1.82568200 | 2.37112500  |
| O  | -2.33523300 | -0.58014600 | 1.13100500  |
| C  | -4.99737600 | 1.26823800  | -0.50177600 |
| C  | -3.82404700 | 2.19381900  | -0.57929000 |
| N  | -2.48168800 | 1.80822100  | -0.53589300 |
| C  | -3.86607300 | 3.56097800  | -0.67430400 |
| C  | -1.75747700 | 2.91597700  | -0.59545600 |
| N  | -2.55405300 | 4.00042600  | -0.68164900 |
| H  | 4.86213700  | -1.44728200 | -2.40409500 |
| H  | 6.15552000  | -1.43614200 | -1.19638700 |
| H  | 6.07453700  | -2.74706000 | -2.38381800 |
| H  | 5.18710300  | -3.54152400 | -0.15146900 |
| H  | 3.96036500  | -3.59252800 | -1.40253000 |
| H  | 3.02015100  | 1.59902000  | -5.08049600 |
| H  | 3.45675200  | 1.48663500  | -3.36129900 |
| H  | 2.80490600  | 0.07557300  | -4.20165800 |
| H  | 1.26467300  | 2.69507400  | -3.65641800 |
| H  | 0.58367800  | 1.31443000  | -4.50278400 |
| H  | 5.27569300  | 0.25454300  | 0.94656400  |
| H  | 4.83571700  | 1.17885100  | -0.48519200 |
| H  | 5.95353300  | 1.87759400  | 0.71287400  |
| H  | 4.80723600  | 3.41444700  | 2.66430600  |
| H  | 0.80169500  | 2.13353300  | 2.14451300  |
| H  | 2.37314900  | 3.71234500  | 3.41345700  |
| H  | -5.13201000 | -3.86159300 | -0.44148100 |
| H  | -3.99744000 | -4.69766400 | 0.64932400  |
| H  | -4.53895200 | -3.04662800 | 1.00851600  |
| H  | -2.77961200 | -3.89584600 | -1.37883100 |
| H  | -2.19571700 | -3.01985000 | 0.02039300  |
| H  | -3.65354900 | 0.08404700  | 4.86858900  |
| H  | -3.11378400 | 0.89486000  | 3.38441100  |
| H  | -1.92571200 | 0.15772700  | 4.47967600  |
| H  | -4.03459400 | -1.37767200 | 2.84116200  |
| H  | -2.84272300 | -2.12680200 | 3.93604700  |
| H  | -5.92497300 | 1.84033600  | -0.59928200 |
| H  | -4.95967400 | 0.49593500  | -1.27756700 |
| H  | -5.00932600 | 0.74325100  | 0.46025100  |
| H  | -4.70196300 | 4.24036300  | -0.73340900 |
| H  | -0.68069500 | 2.94470600  | -0.55808300 |
| H  | -2.24223900 | 4.95714400  | -0.75518500 |
| O  | 0.04687200  | 0.87195300  | 0.52420900  |
| O  | 1.46964100  | -0.95007000 | 1.85869500  |
| H  | 0.53626700  | -1.33444500 | 1.99575500  |
| H  | 2.14803900  | -1.70449100 | 1.77023300  |
| O  | 0.33045500  | -1.30428400 | -0.54601100 |
| H  | 0.60089400  | -1.64914700 | -1.41224700 |
| Mn | 1.49761000  | -0.00753000 | 0.16452100  |
| Ga | -1.36181200 | -0.02743800 | -0.47108200 |

(d) Ga<sup>III</sup>Fe<sup>III</sup> active site with terminal H<sub>2</sub>O on Ga<sup>III</sup>, μ-O, μ-OH bridges

|   |             |             |             |
|---|-------------|-------------|-------------|
| C | 5.47031200  | -2.08425600 | -1.75503400 |
| C | 4.76764300  | -2.95120200 | -0.68610800 |
| C | 3.74820700  | -2.21300200 | 0.18882700  |
| O | 3.15672900  | -1.14142300 | -0.33519000 |
| O | 3.47597500  | -2.67303500 | 1.36896800  |
| C | 2.73487400  | 1.16519100  | -4.11593000 |
| C | 1.50307000  | 1.89379700  | -3.51171300 |
| C | 0.96157600  | 1.21511800  | -2.24707200 |
| O | 1.87614100  | 0.94204400  | -1.32283700 |
| O | -0.30157400 | 0.95879400  | -2.14737500 |
| C | 5.05711700  | 1.26408700  | 0.58223400  |
| C | 3.96481800  | 1.72394100  | 1.49996600  |
| N | 2.62153800  | 1.28745100  | 1.42498800  |
| C | 4.06554700  | 2.61078100  | 2.57401000  |
| C | 1.93747700  | 1.88347600  | 2.42830300  |
| N | 2.78393700  | 2.69413700  | 3.14600700  |
| C | -4.25734600 | -3.73184100 | 0.20147600  |
| C | -3.14853600 | -3.27356700 | -0.78401000 |
| C | -3.48630700 | -1.93414700 | -1.46300100 |
| O | -4.64983300 | -1.66723600 | -1.88699000 |
| O | -2.45390900 | -1.05418700 | -1.61312400 |
| C | -2.92717000 | 0.04465200  | 4.04868900  |
| C | -3.00497500 | -1.33861700 | 3.35027900  |
| C | -1.89873300 | -1.36976100 | 2.29922700  |
| O | -0.73632400 | -1.80310600 | 2.65305200  |
| O | -2.21559000 | -0.86777900 | 1.12150400  |
| C | -4.99737300 | 1.26823900  | -0.50177300 |
| C | -3.83161500 | 2.21228900  | -0.40063800 |
| N | -2.46600500 | 1.82109200  | -0.32215300 |
| C | -3.87957200 | 3.60720200  | -0.33460900 |
| C | -1.72979100 | 2.94941200  | -0.20518500 |
| N | -2.55119800 | 4.05469800  | -0.21218000 |
| H | 4.72601000  | -1.57179700 | -2.38766800 |
| H | 6.10439400  | -1.30943100 | -1.28628600 |
| H | 6.11485500  | -2.71182400 | -2.39790100 |
| H | 5.49216300  | -3.43480200 | -0.00623800 |
| H | 4.21060600  | -3.77567600 | -1.17892600 |
| H | 3.12296200  | 1.72864000  | -4.98408100 |
| H | 3.53480400  | 1.07159600  | -3.36237600 |
| H | 2.46312800  | 0.15046300  | -4.45944700 |
| H | 1.79129100  | 2.92838200  | -3.23478300 |
| H | 0.67426200  | 1.95593700  | -4.23740400 |
| H | 5.42143700  | 0.26197000  | 0.87342700  |
| H | 4.68622600  | 1.18534800  | -0.45309900 |
| H | 5.90907800  | 1.96507900  | 0.61478800  |
| H | 4.91988100  | 3.15880000  | 2.96018400  |
| H | 0.88140700  | 1.72490300  | 2.62265900  |
| H | 2.52192700  | 3.24793100  | 3.96026400  |
| H | -5.23591400 | -3.75689500 | -0.30878300 |
| H | -4.03223600 | -4.74021200 | 0.59559900  |
| H | -4.33098200 | -3.03287500 | 1.05328100  |
| H | -3.04023700 | -4.02506900 | -1.59382300 |
| H | -2.17150900 | -3.18505500 | -0.28000500 |
| H | -3.71316900 | 0.13851500  | 4.82090300  |
| H | -3.06488700 | 0.85793900  | 3.31349300  |
| H | -1.94566300 | 0.17424500  | 4.54018400  |
| H | -3.98810800 | -1.46833800 | 2.86649800  |



|    |             |             |             |
|----|-------------|-------------|-------------|
| H  | -2.83891500 | -2.15070900 | 4.07845100  |
| H  | -5.93669700 | 1.83469800  | -0.62222800 |
| H  | -4.88827200 | 0.56588300  | -1.34859400 |
| H  | -5.07681100 | 0.64548200  | 0.40888100  |
| H  | -4.72651800 | 4.28658200  | -0.36541800 |
| H  | -0.64863900 | 2.97126500  | -0.10662700 |
| H  | -2.24616700 | 5.02511500  | -0.15274900 |
| O  | 0.08779800  | 0.75605900  | 0.69243700  |
| O  | 1.52690800  | -1.16108400 | 1.89427400  |
| H  | 0.54363900  | -1.48224500 | 2.16373800  |
| H  | 2.29449800  | -1.88150900 | 1.86124100  |
| O  | 0.37811600  | -1.28081900 | -0.58459400 |
| H  | 0.73668000  | -1.76840900 | -1.36703300 |
| Ga | 1.57405900  | -0.08389600 | 0.31419700  |
| Fe | -1.33267866 | -0.02029254 | -0.46333934 |

#### Full reference on Gaussian 09 Software package

Gaussian 09, Revision D.01, Frisch, M. J.; Trucks, G. W.; Schlegel, H. B.; Scuseria, G. E.; Robb, M. A.; Cheeseman, J. R.; Scalmani, G.; Barone, V.; Mennucci, B.; Petersson, G. A.; Nakatsuji, H.; Caricato, M.; Li, X.; Hratchian, H. P.; Izmaylov, A. F.; Bloino, J.; Zheng, G.; Sonnenberg, J. L.; Hada, M.; Ehara, M.; Toyota, K.; Fukuda, R.; Hasegawa, J.; Ishida, M.; Nakajima, T.; Honda, Y.; Kitao, O.; Nakai, H.; Vreven, T.; Montgomery, Jr., J. A.; Peralta, J. E.; Ogliaro, F.; Bearpark, M.; Heyd, J. J.; Brothers, E.; Kudin, K. N.; Staroverov, V. N.; Kobayashi, R.; Normand, J.; Raghavachari, K.; Rendell, A.; Burant, J. C.; Iyengar, S. S.; Tomasi, J.; Cossi, M.; Rega, N.; Millam, J. M.; Klene, M.; Knox, J. E.; Cross, J. B.; Bakken, V.; Adamo, C.; Jaramillo, J.; Gomperts, R.; Stratmann, R. E.; Yazyev, O.; Austin, A. J.; Cammi, R.; Pomelli, C.; Ochterski, J. W.; Martin, R. L.; Morokuma, K.; Zakrzewski, V. G.; Voth, G. A.; Salvador, P.; Dannenberg, J. J.; Dapprich, S.; Daniels, A. D.; Farkas, Ö.; Foresman, J. B.; Ortiz, J. V.; Cioslowski, J.; Fox, D. J. Gaussian, Inc., Wallingford CT, 2009.
